# Supplementary material for: Outcomes from a three-arm randomized controlled trial of frequent immersion in thermoneutral water on cardiovascular risk factors
Source: PubMed Central journal article supplement (PMC4964283; doi:10.1186/s12906-016-1241-7), 2016-07-27
Supplement: 12906_2016_1241_MOESM1_ESM.pdf [file 12906_2016_1241_MOESM1_ESM.pdf]

**Suppl. Table S1: Mineral content of the therapeutic pools (mg/L)**

| <b>Cations</b>                | <b>Bad Krozingen</b> | <b>Freiburg</b> | <b>Bad Bellingen</b> |
|-------------------------------|----------------------|-----------------|----------------------|
| Ca <sup>+2</sup>              | 821                  | 637             | 355                  |
| Na <sup>+2</sup>              | 301                  | 403             | 1060                 |
| Mg <sup>+2</sup>              | 98                   | 149             | 118                  |
| K <sup>+</sup>                | 73                   | 70              | 31                   |
| <b>Anions</b>                 |                      |                 |                      |
| SO <sub>4</sub> <sup>-2</sup> | 1710                 | 2250            | 152                  |
| HCO <sub>3</sub> <sup>-</sup> | 1208                 | 866             | 845                  |
| Cl <sup>-</sup>               | 115                  | 91              | 2040                 |
| CO <sub>2</sub>               | 1245                 | 691             | 1010                 |
