# Supplementary material for: Outcomes from a three-arm randomized controlled trial of frequent immersion in thermoneutral water on cardiovascular risk factors
Source: PubMed Central journal article supplement (PMC4964283; doi:10.1186/s12906-016-1241-7), 2016-07-27
Supplement: 12906_2016_1241_MOESM2_ESM.pdf [file 12906_2016_1241_MOESM2_ESM.pdf]

**Suppl. Table S2: Antihypertensive medication (intention-to-treat population, N = 59)**

| Group             |      |     |           |     |               |        | Antihypertensive medication |   |   |     | N (%)         |
|-------------------|------|-----|-----------|-----|---------------|--------|-----------------------------|---|---|-----|---------------|
|                   | ACEI | ARB | Diuretics | CCB | Beta blockers | Others | 1                           | 2 | 3 | > 3 |               |
| Bath1<br>N = 19   | 5    | 4   | 5         | 6   | 4             | 1      | 3                           | 4 | 3 | 1   | 11<br>(57.9%) |
| Bath2<br>N = 21   | 3    | 3   | 2         | 2   | 2             | -      | 4                           | 2 | - | 1   | 7<br>(33.3%)  |
| Control<br>N = 19 | 6    | 5   | 5         | 4   | 4             | 1      | 8                           | 5 | 1 | 1   | 15<br>(78.9%) |
| N = 33            |      |     |           |     |               |        |                             |   |   |     |               |
| (55.9%)           |      |     |           |     |               |        |                             |   |   |     |               |

ACEI: angiotensin-converting enzyme inhibitor;

ARB: angiotensin receptor blocker;

CCB: calcium channel blocker
